# A Genomic Fossil Reveals Key Steps in Hemoglobin Loss by the Antarctic Icefishes

Thomas J. Near,\* Sandra K. Parker,† and H. William Detrich III†

\*Department of Ecology and Evolutionary Biology, Yale University; and †Department of Biology, Northeastern University

Antarctic icefishes are the only vertebrates that do not have hemoglobin and erythrocytes in their blood. These startling phenotypes are associated in several icefish species with deletions of juvenile and adult globin loci, which in red-blooded teleosts are typically composed of tightly linked pairs of  $\alpha$ - and  $\beta$ -globin genes. It is unknown if the loss of hemoglobin expression in icefishes was the direct result of such deletions or if other mutational events compromised globin chain synthesis prior to globin gene loss. In this study, we show that 15 of the 16 icefish species have lost the adult  $\beta$ -globin gene but retain a truncated  $\alpha$ -globin pseudogene. Surprisingly, a phylogenetically derived icefish species, *Neopagetopsis ionah*, possesses a complete, but nonfunctional, adult  $\alpha\beta$ -globin complex. This cluster contains 2 distinct  $\beta$ -globin pseudogenes whose phylogenetic origins span the entire Antarctic notothenioid radiation, consistent with an origin via introgression. Maximum likelihood ancestral state reconstruction supports a scenario of icefish globin gene evolution that involves a single loss of the transcriptionally active adult  $\alpha\beta$ -globin cluster prior to the diversification of the extant species in the clade. Through lineage sorting of ancestral polymorphism, 2 types of alleles became fixed in the clade: 1) the  $\alpha$ -globin pseudogene of the majority of species and 2) the inactive  $\alpha\beta$ -globin complex of *N. ionah*. We conclude that the globin pseudogene complex of *N. ionah* is a “genomic fossil” that reveals key intermediate steps on the pathway to loss of hemoglobin expression by all icefish species.

## Introduction

Possession of red blood cells containing the oxygen transporter hemoglobin is virtually synonymous with vertebrate life. Imagine the surprise of the scientific community when Ruud (1954) published his observation that the blood of Antarctic icefishes was devoid of oxygen-transporting proteins. In his study, Ruud (1954) characterized the blood of the blackfin icefish, *Chionocephalus aceratus*, as nearly transparent, lacking erythrocytes and hemoglobin, containing leukocytes at <1% by volume, and iron poor. Noting that the blood of at least 3 other icefishes, *Champocephalus esox*, *Champocephalus gunnari*, and *Pseudochaenichthys georgianus*, is also “colourless,” he suggested that loss of the vertebrate oxygen transporter is a common character of icefishes (Ruud 1958). Indeed, subsequent work has demonstrated that the absence of hemoglobin is a characteristic of all the extant icefish species that diversified ~8.5 MYA (di Prisco et al. 2002; Near 2004). Ruud (1954) surmised that loss of red cells and hemoglobin is possible only in the very cold (−1.9 to +1 °C) and oxygen-saturated waters of the Southern Ocean but did not speculate on underlying genetic mechanisms.

Icefishes (Channichthyidae) are a phylogenetically derived clade of the Notothenioidei, a lineage that as a whole represents an adaptive radiation in the frigid waters of the Southern Ocean surrounding Antarctica (Eastman 1993; Near et al. 2003, 2004; Eastman 2005). With the exception of the 16 icefish species, all other notothenioid species possess red blood and express hemoglobin (di Prisco et al. 1991; D’Avino and di Prisco 1997; di Prisco 1998; Verde et al. 2004). As in most other teleosts, the globin loci of the red-blooded notothenioids are organized as  $\alpha\beta$ -gene pairs that are linked 5′-to-5′, or head-to-head, with regulatory elements located in the intergenic region (Cocca et al.

1995; Lau et al. 2001; Gillemans et al. 2003). Our previous work has shown that the genomes of 2 icefish species, *C. aceratus* and *Chionodraco rastrispinosus*, lack most of the adult  $\alpha\beta$ -globin complex, retaining only a pseudogene that consists of a 3′ fragment of the  $\alpha$ -globin gene (Cocca et al. 1995; Zhao et al. 1998).

Did the absence of hemoglobin expression in icefishes occur via a single mutational event prior to the diversification of the extant icefish species that deleted all but a small remnant of the  $\alpha\beta$ -globin gene cluster or were multiple mutational steps involved? To address these questions, we investigated the evolutionary history of the  $\alpha\beta$ -globin genes in icefishes through comparative phylogenetic analyses that included all icefish species as well as other species from several lineages of red-blooded, hemoglobin-expressing Antarctic notothenioids. We report here that a derived icefish species, *Neopagetopsis ionah*, retains a complete, but nonfunctional, adult  $\alpha\beta$ -globin complex, which we interpret as an intermediate evolutionary event that abrogated globin expression prior to near total globin gene extinction. This genomic fossil must have arisen through interspecific introgression between lineages that span the entire notothenioid radiation.

## Materials and Methods

Specimen Collection, DNA Sequencing, and Analysis of  $\alpha$ - and  $\beta$ -Globin Genes

Notothenioid specimens were collected through the course of several Antarctic expeditions. Species sampled, tissue collection numbers, and museum voucher catalogue numbers (if available) are shown in table 1. Many of these specimens are identical to those used in a previous analysis of icefish phylogenetic relationships (Near et al. 2003).

Genomic DNA was prepared from testis, spleen, pronephric kidney, or muscle by use of DNAzol (Molecular Research Center, Inc., Cincinnati, OH). Globin genes and pseudogenes were amplified by polymerase chain reaction (PCR); reactions contained 200  $\mu$ M deoxynucleoside triphosphates (dATP, dCTP, dGTP, and dTTP), 0.4  $\mu$ M of each primer, 3.0 mM MgCl<sub>2</sub>, 2.5 units of Qiagen *Taq* DNA

Key words: hemoglobin loss by icefishes, genomic instability, genetic introgression, interspecific hybridization, Channichthyidae, Notothenioidei.

E-mail: iceman@neu.edu.

*Mol. Biol. Evol.* 23(11):2008–2016. 2006

doi:10.1093/molbev/msl071

Advance Access publication July 26, 2006

**Table 1**  
**Specimen Information, GenBank Accession Numbers, and PCR Primer Pairs**

| Species                             | Family           | Voucher   | Locality                                    | GenBank  | PCR Primers                           | Gene            |
|-------------------------------------|------------------|-----------|---------------------------------------------|----------|---------------------------------------|-----------------|
| <i>Dolloidraco longedorsalis</i>    | Artedidraconidae | UTTC 1793 | Ross Sea 76° 30' S, 171° 9' E               | DQ317935 | AGS, AGAS                             | α-globin        |
| <i>Pogonophyrne marmorata</i>       | Artedidraconidae | UTTC 2023 | Elephant Island 61° 03' S, 54° 44' W        | DQ317937 | AGS, AGAS                             | α-globin        |
| <i>Akarotaxis nudiceps</i>          | Bathydraconidae  | UTTC 1795 | Ross Sea 75° 02' S, 166° 16' E              | DQ317934 | 3AS, OSS1                             | α-globin        |
| <i>Bathydraco macrolepis</i>        | Bathydraconidae  | UTTC 1787 | Ross Sea 77° 19' S, 165° 41' E              | DQ317936 | 3AS, OSS1                             | α-globin        |
| <i>Bathydraco marri</i>             | Bathydraconidae  | UTTC 1712 | Weddell Sea 75° 16' S, 26° 39' W            | DQ317933 | 3AS, OSS1                             | α-globin        |
| <i>Cygnodraco mawsoni</i>           | Bathydraconidae  | HDW 115   | Ross Sea, Terra Nova Bay                    | DQ317939 | 3AS, NS1                              | α-globin        |
| <i>Cygnodraco mawsoni</i>           | Bathydraconidae  | GenBank   | NA                                          | AF067566 | NA                                    | β-globin        |
| <i>Gerlachea australis</i>          | Bathydraconidae  | UTTC 1722 | Weddell Sea 75° 00' S, 28° 00' W            | DQ317938 | 3AS, NS1                              | α-globin        |
| <i>Gymnodraco acuticeps</i>         | Bathydraconidae  | HDW 116   | Antarctic Peninsula                         | DQ317940 | 3AS, NS1                              | α-globin        |
| <i>Gymnodraco acuticeps</i>         | Bathydraconidae  | GenBank   | NA                                          | AF067568 | NA                                    | β-globin        |
| <i>Parachaenichthys charcoti</i>    | Bathydraconidae  | UTTC 2009 | Elephant Island 61° 15' S, 55° 37' W        | DQ317944 | 3AS, NS1; BF1, OBR4;<br>A1ASL, B1AS2L | α- and β-globin |
| <i>Parachaenichthys charcoti</i>    | Bathydraconidae  | HDW 114   | Antarctic Peninsula                         | DQ317943 | 3AS, NS1; BF1, OBR4;<br>A1ASL, B1AS2L | α- and β-globin |
| <i>Prionodraco evansi</i>           | Bathydraconidae  | UTTC 2300 | Weddell Sea                                 | DQ317941 | 3AS, NS1                              | α-globin        |
| <i>Racovitzia glacialis</i>         | Bathydraconidae  | UTTC 1789 | Ross Sea 75° 30' S, 174° 56' E              | DQ317942 | 3AS, NS1                              | α-globin        |
| <i>Chaenocephalus aceratus</i>      | Channichthyidae  | UTTC 2002 | Elephant Island 61° 04' S, 54° 34' W        | DQ317945 | 3AS, CAF1                             | α-globin        |
| <i>Chaenocephalus aceratus</i>      | Channichthyidae  | GenBank   | NA                                          | AF049914 | NA                                    | α- and β-globin |
| <i>Chaenodraco wilsoni</i>          | Channichthyidae  | UTTC 2003 | South Shetland Islands 61° 44' S, 58° 21' W | DQ317963 | NAS8, CAF2                            | α-globin        |
| <i>Chaenodraco wilsoni</i>          | Channichthyidae  | HDW 101   | Ross Sea, Terra Nova Bay                    | DQ317956 | NAS8, CAF2                            | α-globin        |
| <i>Champscephalus esox</i>          | Channichthyidae  | UTTC 1728 | Falkland Islands 51° 25' S, 57° 35' W       | DQ317950 | 3AS, CAF3                             | α-globin        |
| <i>Champscephalus gunnari</i>       | Channichthyidae  | UTTC 2005 | Elephant Island 61° 12' S, 54° 44' W        | DQ317951 | 3AS, CAF1                             | α-globin        |
| <i>Champscephalus gunnari</i>       | Channichthyidae  | HDW 111   | Antarctic Peninsula                         | DQ317965 | 3AS, CAF1                             | α-globin        |
| <i>Channichthys rhinoceratus</i>    | Channichthyidae  | HWD 108   | Kerguelen Islands                           | DQ317955 | 3AS, CAF1                             | α-globin        |
| <i>Chionobathyscus dewitti</i>      | Channichthyidae  | HDW 104   | Enderby Land 66° 29' S,<br>48° 23' E        | DQ317949 | NAS8, CAF2                            | α-globin        |
| <i>Chionodraco hamatus</i>          | Channichthyidae  | HDW 102   | Ross Sea, Terra Nova Bay                    | DQ317952 | NAS8, CAF2                            | α-globin        |
| <i>Chionodraco myersi</i>           | Channichthyidae  | HDW 105   | Prydz Bay, 67° 07' S, 75° 16' E             | DQ317953 | NAS8, CAF2                            | α-globin        |
| <i>Chionodraco rastrispinosus</i>   | Channichthyidae  | UTTC 2006 | Elephant Island 61° 10' S, 54° 34' W        | DQ317954 | 3AS, CAF1                             | α-globin        |
| <i>Chionodraco rastrispinosus</i>   | Channichthyidae  | Genbank   | NA                                          | AF049915 | 3AS, CAF1                             | α- and β-globin |
| <i>Cryodraco antarcticus</i>        | Channichthyidae  | UTTC 2007 | Elephant Island 60° 58' S, 55° 05' W        | DQ317947 | NAS8, CAF2                            | α-globin        |
| <i>Cryodraco antarcticus</i>        | Channichthyidae  | HDW 107   | Ross Sea, Terra Nova Bay                    | DQ317946 | NAS8, CAF2                            | α-globin        |
| <i>Cryodraco atkinsoni</i>          | Channichthyidae  | HDW 106   | Prydz Bay, 67° 07' S, 75° 16' E             | DQ317948 | NAS8, CAF2                            | α-globin        |
| <i>Dacodraco hunteri</i>            | Channichthyidae  | UTTC 1988 | Ross Sea 119° 77' 19' S, 165° 41' E         | DQ317957 | 3AS, CAF1                             | α-globin        |
| <i>Neopagetopsis ionah</i>          | Channichthyidae  | UTTC 4222 | Elephant Island 61° 0.0' S 55° 04' W        | DQ317966 | 3AS, NS1; BF1, OBR4;<br>A1ASL, B1AS2L | α- and β-globin |
| <i>Neopagetopsis ionah</i>          | Channichthyidae  | HDW 113   | Enderby Land 66° 29' S, 48° 23' E           | DQ317966 | 3AS, NS1; BF1, OBR4;<br>A1ASL, B1AS2L | α- and β-globin |
| <i>Pagetopsis macropterus</i>       | Channichthyidae  | UTTC 2011 | South Shetland Islands 62° 10' S, 60° 28' W | DQ317962 | NAS8, CAF2                            | α-globin        |
| <i>Pagetopsis macropterus</i>       | Channichthyidae  | HDW 103   | Antarctic Peninsula                         | DQ317960 | NAS8, CAF2                            | α-globin        |
| <i>Pagetopsis maculatus</i>         | Channichthyidae  | UTTC 2041 | Ross Sea 77° 19' S, 165° 41' E              | DQ317961 | 3AS, CAF3                             | α-globin        |
| <i>Pseudochaenichtys georgianus</i> | Channichthyidae  | UTTC 2010 | Elephant Island 61° 17' S, 55° 43' W        | DQ317958 | NAS8, CAF2                            | α-globin        |
| <i>Pseudochaenichtys georgianus</i> | Channichthyidae  | HDW 109   | Antarctic Peninsula                         | DQ317959 | NAS8, CAF2                            | α-globin        |
| <i>Notothenia angustata</i>         | Nototheniidae    | GenBank   | NA                                          | AF187046 | NA                                    | α- and β-globin |
| <i>Notothenia coriiceps</i>         | Nototheniidae    | GenBank   | NA                                          | AF049916 | NA                                    | α- and β-globin |
| <i>Pagothenia borchgrevinki</i>     | Nototheniidae    | GenBank   | NA                                          | AF067567 | NA                                    | β-globin        |
| <i>Trematomus bernacchii</i>        | Nototheniidae    | GenBank   | NA                                          | AF067570 | NA                                    | β-globin        |
| <i>Trematomus hansonii</i>          | Nototheniidae    | GenBank   | NA                                          | AF067571 | NA                                    | β-globin        |
| <i>Trematomus newnesi</i>           | Nototheniidae    | GenBank   | NA                                          | AF067569 | NA                                    | β-globin        |

NOTE.—NA, not available.

**Table 2**  
**Primer Sequences Used to Amplify Globin Genes**

| Primer | Sequence                  |
|--------|---------------------------|
| CAF1   | CGACTATCTAGGACCAAG        |
| CAF2   | TCACTCTGCAGGTTACTGTC      |
| CAF3   | GCTCTAGACTAGAGAGTC        |
| 3AS    | TAGCGGTATCTCTCAGCGAG      |
| NAS8   | TGCATGTGGCATTCCCTC        |
| NS1    | TCTCTCCGACAAAGACAAGG      |
| OSS1   | AAAGACAAGGCAGCAGTCAA      |
| AGS    | GTCTCTCCGACAARGAYAA       |
| AGSA   | TATCTCTCAGCGAGAGCCAG      |
| AIASL  | GATGCACTACCTGCTCAGAGCATC  |
| BIASL2 | CTGCTGAGAGCCTTGGGTCCGATGT |
| OBF1   | AGCGATTCCGAGCGTGCCATTATC  |
| OBR4   | TTAGTGGTACTGCTTCCAGG      |

polymerase, 1× Q solution, 1× Qiagen PCR buffer, and 0.3 µg of genomic DNA. Primer sequences are given in table 2, and primer pairs used to amplify globin genes for each specimen are listed in table 1. Touchdown PCR was performed for 11 cycles using the following parameters: 1) denaturation for 1 min at 94 °C; 2) primer annealing for 1 min, ramping temperature from 60 °C to 50 °C in one-degree increments per cycle; and 3) extension for 1 min at 72 °C. Subsequently, 15 cycles of conventional PCR were performed using the following profile: 1) denaturation for 1 min at 94 °C, 2) primer annealing for 1 min at 50 °C, and 3) extension for 1 min at 72 °C. A final extension was performed for 5 min at 72 °C. Amplified products were used as templates for automated DNA sequencing (University of Maine DNA Sequencing Facility), either directly or following subcloning.

ClustalX (Thompson et al. 1997) was used to align the DNA sequences with minor adjustments made by eye. All DNA sequences have been submitted to GenBank (table 1). Modeltest 3.0 (Posada and Crandall 1998) was used to estimate likelihood parameters for the  $\alpha$ - and  $\beta$ -globin DNA alignments (F81 substitution model with among-site rate variation following a gamma distribution, shape parameter = 0.1948). PAUP\* 4.0 (Swofford 2003) was used to construct Neighbor-Joining and maximum parsimony trees with bootstrap analyses including 2,000 pseudoreplicates. We also obtained trees and posterior probabilities for nodes in the analysis of  $\beta$ -globin gene sequences with the computer program MrBayes 3.0 (Ronquist and Huelsenbeck 2003) using  $4 \times 10^6$  Markov chain Monte Carlo generations. We discarded the first  $1 \times 10^6$  generations as “burn-in” trees.

### Phylogenetic Relationships of Icefishes

The conclusions drawn in this study rely upon the validity of the reference icefish phylogeny, specifically the placement of *N. ionah* as a derived species. In a previous study, Near et al. (2003) investigated the phylogenetic relationships of the 16 icefish species using mtDNA gene sequences (the complete 16S large-subunit ribosomal RNA and the complete coding region of reduced nicotinamide adenine dinucleotide dehydrogenase subunit 2 [ND2]) and 58 discrete morphological characters. The total evidence data set was sufficiently robust to reject 2 of 4

previous hypotheses of icefish relationships. Furthermore, 22 characters from external morphology and osteology supported the derived phylogenetic placement of *N. ionah* (Near et al. 2003).

In the present study, we used these mtDNA gene alignments and maximum parsimony trees (Near et al. 2003) to assess alternative phylogenetic relationships among icefishes, specifically the hypothesis that *N. ionah* is a basal lineage and represents the sister species of all other icefishes. The best tree that depicted *N. ionah* as basal in the clade was determined using maximum parsimony constraint searches in PAUP\* 4.0 (Swofford 2003). To test the null hypothesis that the published (Near et al. 2003) and constrained trees are equally good explanations of the data, we applied a maximum likelihood Shimodaira–Hasegawa test as implemented in PAUP\*. The optimal molecular evolutionary model and parameter values for the mtDNA data set were determined by using Akaike information criteria as executed in the computer program Modeltest 3.0 (Posada and Crandall 1998, 2001).

### Ancestral Character State Reconstruction

To estimate ancestral character states of the globin cluster in icefishes and other closely related Antarctic notothenioid clades, we employed a maximum likelihood strategy (Schluter et al. 1997; Pagel 1999). The phylogeny presented in figure 1b was rooted with *Harpagifer antarcticus* (Harpagiferidae) and *Dolloidraco longedorsalis* (Artedidraconidae) and included 5 dragonfish species (Bathydraconidae) that were used in a previous phylogenetic analysis of icefishes (Near et al. 2003). The maximum likelihood branch lengths of this phylogeny were converted to relative divergence times by “calibrating” the basal node to 100 arbitrary time units and using penalized likelihood as executed in the computer software r8s (Sanderson 2002, 2003). The optimal smoothing parameter value (31.62) was determined with the cross-validation analysis available in r8s. The rate-smoothed phylogeny with branch lengths as relative divergence times was used as the model tree in subsequent ancestral state reconstructions.

The computer program Mesquite v. 1.11 (Maddison WP and Maddison DR 2006) was used to implement ancestral state reconstruction and calculation of maximum likelihood scores. One of two character states was scored for all species in the analysis: 1) a complete or nearly complete  $\alpha\beta$ -globin cluster present or 2) a truncated  $\alpha$ -globin pseudogene present. We used a likelihood ratio test with 1 degree of freedom (df) to discriminate between the one-parameter Markov k-state model (Mk1) that is a generalization of the Jukes–Cantor model (Lewis 2001) and the asymmetrical 2-parameter Markov k-state model that has 2 different rates of change for character losses and gains (Pagel 1997; Mooers and Schluter 1999).

Maximum likelihood scores from the reconstructions were also employed to test the hypothesis that the  $\alpha\beta$ -globin cluster was transformed to the  $\alpha$ -globin pseudogene on 4 different occasions in the course of icefish diversification. Using a modified asymmetric 2-parameter model, we assumed that the rate of regaining the  $\alpha\beta$ -globin cluster after transformation to the  $\alpha$ -globin pseudogene was zero

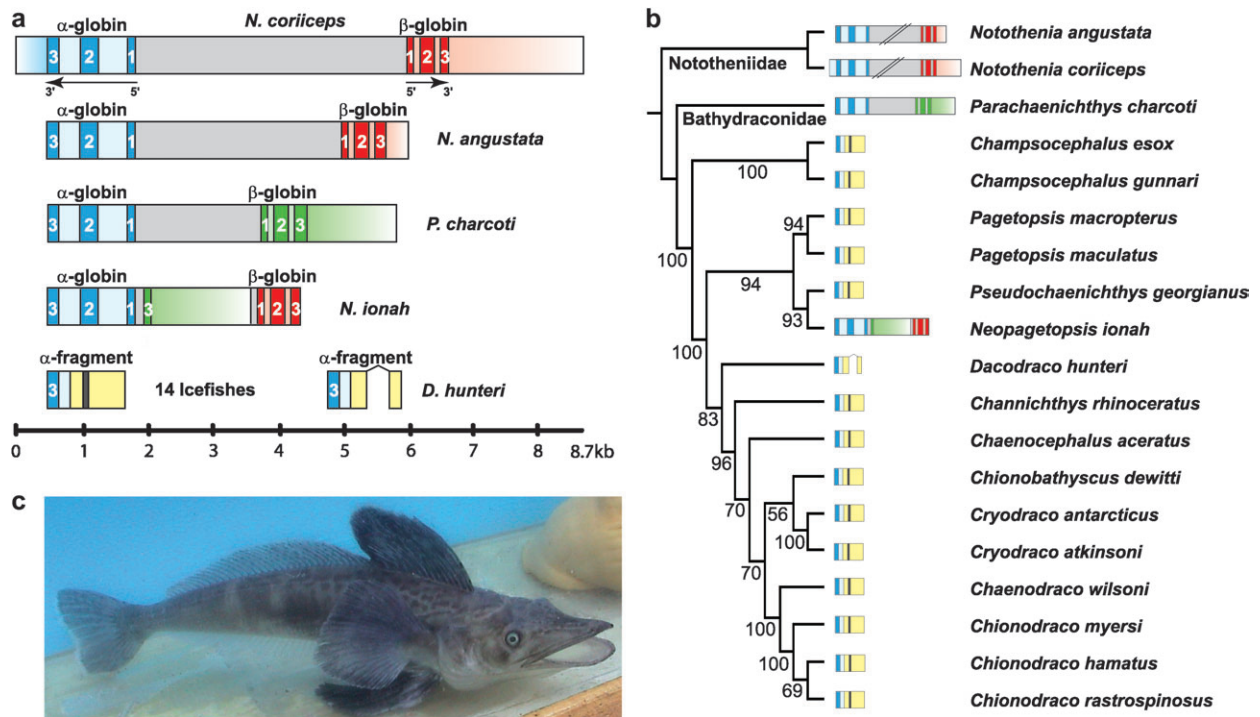

FIG. 1.—Loss of globin genes in the Antarctic icefishes. (a) Globin loci and pseudogenes of notothenioid fishes. Top 3 cartoons: organization of the adult  $\alpha$ - $\beta$ -globin gene complexes of the red-blooded fishes *Notothenia coriiceps*, *Notothenia angustata*, and *Parachaenichthys charcoti*, respectively. The 3 exons of the orthologous  $\alpha$ -globin genes are shown in blue, the 2 introns in light blue, and the 3' UTRs (if sequenced) in light blue gradient fill. The 3 exons of the 2 nototheniid  $\beta$ -globin genes are presented in red, the 2 introns in light red, and the 3' UTRs in light red gradient fill, whereas the dragonfish exons, introns, and 3'-UTR are colored green, light green, and light green gradient fill, respectively. The intergenic regions between the globin genes are shown in gray. Bottom 3 cartoons: structures of the globin pseudogenes of icefishes. The  $\alpha$ -globin gene of *Neopagetopsis ionah* is colored as for the red-blooded fishes (above). The 2 *N. ionah*  $\beta$ -globin pseudogenes are colored to indicate their phylogenetic relationships to the nototheniid and dragonfish  $\beta$ -globin genes (fig. 4a). Remnants of the nototheniid intergenic region are gray. Fourteen icefish species retain a portion of intron 2 and exon 3 of the nototheniid  $\alpha$ -globin gene abutted by an orthologous tRNA gene-containing chromosomal fragment (black tRNA gene embedded in yellow). The tRNA gene is deleted from the *Dacodraco hunteri* derivative. Lengths of sequence components can be estimated from the scale at bottom. (b) Globin gene clusters mapped onto a maximum parsimony phylogeny of icefishes and other Antarctic notothenioid lineages based on analyses of complete ND2 and 16S ribosomal RNA (2,750 bp) mtDNA gene sequences and 58 morphological characters (Near et al. 2003). Numbers at nodes report maximum parsimony bootstrap support values (2,000 pseudoreplicates). (c) Photograph of a *N. ionah* specimen (standard length 46 cm) collected at the South Shetland Islands, March 2003.

(Kohlsdorf and Wagner forthcoming) in accordance with Dollo's law of irreversibility (once a complex character is lost, it cannot be regained [Simpson 1953; Gould 1970; Bull and Charnov 1985]). The rate of character loss was adjusted to require 4 losses of the  $\alpha$ - $\beta$ -globin cluster. This procedure constrained several internal nodes in the icefish phylogeny to be reconstructed as possessing the  $\alpha$ - $\beta$ -globin cluster. We compared the likelihood scores of this 4-loss model with the Mk1 model using a likelihood ratio test with  $df = 1$ .

## Results and Discussion

### Status of Icefish $\alpha$ - and $\beta$ -Globin Genes

Using PCR on genomic DNA extracts, we determined the nucleotide sequences of the  $\alpha$ -globin pseudogene for all 16 icefish species (table 1). We also sequenced the adult  $\alpha$ - $\beta$ -globin cluster for the hemoglobin-expressing dragonfish, *Parachaenichthys charcoti* (Bathydraconidae), a species in the sister lineage of icefishes (Balushkin 2000; Derome et al. 2002; Near et al. 2004). We found a breakpoint in intron 2 of the  $\alpha$ -globin pseudogene that was identical in 15 of these species. Furthermore, the genomic DNA conjoined to the pseudogene, via nonhomologous recombina-

tion or intrachromosomal rearrangement, was very similar in sequence across all species. However, an isoleucine transfer RNA (tRNA) found upstream of intron 2 in 14 icefish species was absent in the  $\alpha$ -globin pseudogene of *Dacodraco hunteri* (fig. 1a).

Unexpectedly, the genome of the phylogenetically derived icefish species, *N. ionah*, contained 2  $\beta$ -globin pseudogenes and a full-length  $\alpha$ -globin gene (fig. 1a and c). The first  $\beta$ -globin pseudogene consisted of the 3' portion of exon 3 and the 3' untranslated region (UTR). The second  $\beta$ -globin pseudogene in *N. ionah* was essentially complete, containing the 3 exons and 2 introns seen in *Notothenia coriiceps*, *Notothenia angustata*, and *P. charcoti*; however, there was a splice-site mutation at the junction of intron 1 and exon 2 (10-bp deletion that includes the CAG/G acceptor site) that undoubtedly renders this  $\beta$ -globin gene non-functional (fig. 1a). The validity of the *N. ionah* gene organization was confirmed by recovery of identical globin gene complexes from 2 specimens, the first captured near Enderby Land and the second from nearshore habitats of the South Shetland Islands (Kock and Stransky 2000).

Due to the derived position of *N. ionah* in the icefish phylogeny (fig. 1b), one might postulate a scenario in which the  $\alpha$ -globin pseudogene present in all other icefishes is

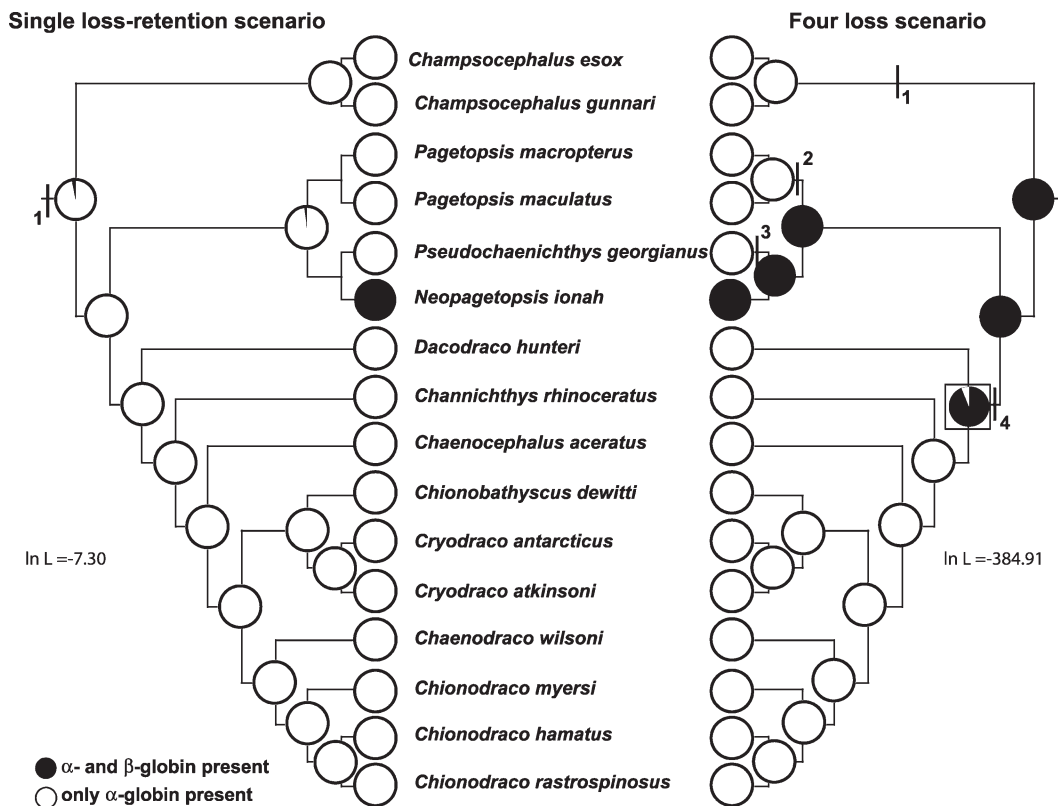

FIG. 2.—Maximum likelihood ancestral state reconstruction of the icefish  $\alpha\beta$ -globin cluster. Ancestral state reconstruction depicting the single loss-retention scenario obtained using the Mk1 model is presented on the left, and the reconstruction using a modified asymmetrical 2-parameter model that depicts 4 independent losses is presented on the right (numbered bars indicate inferred losses of the  $\alpha\beta$ -globin cluster). The state of each icefish species is given at the tree tips, and a legend is provided in the lower left corner. The proportion of shading in the pie diagrams represents the relative support for one state versus the other. The only node that did not have significant support for the ancestral reconstruction (4-loss scenario) is enclosed in a box. In L, maximum likelihood score.

explained by 4 independent losses of the  $\alpha\beta$ -globin cluster (4-loss model) whose breakpoints occurred at precisely the same locations during the course of icefish diversification. A more likely interpretation is that the  $\alpha\beta$ -globin cluster in *N. ionah* is an ancestral condition that represents an intermediate state between the functional globin cluster seen in most teleosts, including all non-icefish notothenioids, and the 5'-truncated  $\alpha$ -globin gene present in all other icefish species (single loss-retention model). We propose that the presence of this intermediate condition in the phylogenetically derived *N. ionah* is explained through retention of ancestral genetic polymorphism (Hudson 1990; Hudson and Coyne 2002), specifically the lack of coalescence among ancestral icefish  $\alpha\beta$ -globin alleles. This interpretation is supported by the fairly young evolutionary age of the icefish radiation (Near 2004) and by the fact that, among 20 allozyme loci, more than half of the alleles were shared by 3 or more icefish species (Clément et al. 1998).

#### Alternative Phylogenetic Relationships of Icefishes—Might *N. ionah* Be Ancestral to Other Icefishes?

Our conclusion that the  $\alpha\beta$ -globin cluster of *N. ionah* is an ancestral intermediate on the path to nearly complete elimination of the locus in other icefish species rests on the validity of the currently accepted phylogeny of the clade.

The phylogeny of icefish species presented by Near et al. (2003) (fig. 1b), with the 2 *Champsocephalus* species forming the most basal icefish lineage and *N. ionah* nested within a derived clade, is supported by multiple phylogenetic studies that analyzed discrete morphological characters (Iwami 1985; Voskoboinikova 2000; Near et al. 2003), mtDNA genes (Chen et al. 1998; Near et al. 2003), or both (Near et al. 2003). Nevertheless, we have reexamined the possibility that *N. ionah* may occupy a more ancestral position in the icefish clade.

The robustness of the icefish phylogenetic tree presented in figure 1b was confirmed when we tested this tree against alternative phylogenetic hypotheses. A constrained maximum parsimony search that depicts *N. ionah* as the most basal icefish species resulted in 2 trees. When compared with the phylogeny depicted in figure 1b (In L = -9864.65), both of these alternatives were rejected by the Shimodaira-Hasegawa test (In L = -9,885.39 and -9891.69,  $P = 0.047$  and  $0.028$ , respectively). Therefore, we consider the derived position of *N. ionah* in the icefish phylogeny (fig. 1b) valid and a basal position for this species to be significantly incompatible with the phylogenetic data.

#### Ancestral Character Reconstruction

The evolutionary model of a single loss and retention of the  $\alpha\beta$ -globin cluster in *N. ionah* is supported by

ancestral state reconstruction. Figure 2 shows that maximum likelihood ancestral state reconstruction using the Mk1 model (left) resulted in significant optimizations for all internal nodes in the icefish phylogeny as lacking the  $\alpha\beta$ -globin cluster and possessing the  $\alpha$ -globin pseudogene. A likelihood ratio test failed to detect a significant difference between the Mk1 model and the more complex asymmetric 2-parameter model ( $\chi^2 = 0.20$ ,  $df = 1$ ,  $P = 0.65$ ). To test the model that the  $\alpha\beta$ -globin cluster was lost through 4 independent events in icefishes, the asymmetric 2-parameter model was modified in Mesquite to constrain reconstruction of internal nodes as possessing the  $\alpha\beta$ -globin cluster by using a forward rate of 0.667 and a backward rate equal to 0 (fig. 2, right). The maximum likelihood score for this model was  $-384.91$  and was rejected when compared with the Mk1 model in a likelihood ratio test ( $\chi^2 = 755.22$ ,  $df = 1$ ,  $P < 0.001$ ).

### Phylogenetic Origins of Icefish Globin Genes

In addition to the ancestral state reconstruction, phylogenetic analyses of the  $\alpha$ - and  $\beta$ -globin gene sequences revealed the importance of the *N. ionah*  $\alpha\beta$ -pseudogene cluster in understanding the evolution of hemoglobin loss in icefishes. We aligned the 5'-truncated  $\alpha$ -globin pseudogene (129 bp) present in 15 icefish species with orthologous  $\alpha$ -globin sequences sampled from *N. ionah* and from hemoglobin-expressing Antarctic notothenioid families, including 9 dragonfish species, 2 species of Artedidraconidae, and 2 species of Nototheniidae. Despite limited sequence variability among the icefishes (6 variable nucleotide sites among the 129 bp), Neighbor-Joining analysis demonstrated the monophyly of all icefish  $\alpha$ -globin pseudogenes relative to the  $\alpha$ -globin genes sampled from the 13 red-blooded notothenioid species (fig. 3). Thus, the icefish  $\alpha$ -globin gene fragments share a common ancestry.

Although the  $\alpha$ -pseudogene phylogeny is poorly resolved (due to short sequence length and limited variation) compared with the mtDNA morphology tree (fig. 1*b*), the sharing of 3 pseudogene alleles among multiple icefish species (fig. 3) further supports our hypothesis that allelic sorting of ancestral globin gene sequences is incomplete in the recently diverged icefish clade. Nuclear genes are well known to exhibit slower rates of nucleotide substitution when compared with mtDNA genes (Brown et al. 1979), and ancestral polymorphism of allelic variation in nuclear genes takes much longer to sort among lineages relative to mtDNA genes (Moore 1995; Palumbi et al. 2001; Hudson and Coyne 2002; Hudson and Turelli 2003). Of particular note with respect to the relatively young evolutionary age of the icefish clade (Near 2004), the sharing of mtDNA haplotypes has yet to be demonstrated between any pair of icefish species (Chen et al. 1998; Near et al. 2003; Patarnello et al. 2003).

Phylogenetic analyses of the  $\beta$ -globin alignment (624 bp) demonstrate that the 2  $\beta$ -globin pseudogenes of *N. ionah* have distinct and significantly divergent origins (fig. 4*a*). The internal  $\beta$ -globin pseudogene (composed of the 3' portion of exon 3 and the 3' UTR) shares a close phylogenetic relationship with the dragonfish  $\beta$ -globin genes, which is consistent with the phylogenetic relationships of icefishes relative to other notothenioids (fig. 4*b*). By contrast, the external and

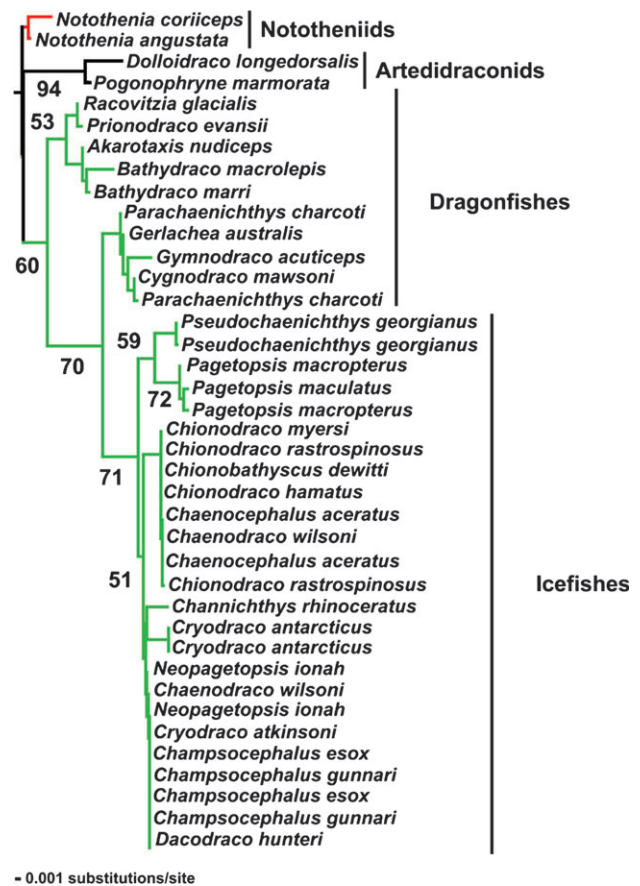

Fig. 3.—Neighbor-Joining inferred phylogeny of exon 3 and intron 2 DNA sequences of the  $\alpha$ -globin gene in notothenioids. Numbers at nodes report support in bootstrap analysis (2,000 pseudoreplicates). Duplicate sequences for single species were determined from independent specimens and are reported here as an indication of intraspecific variability.

nearly complete  $\beta$ -globin pseudogene is phylogenetically related to the  $\beta$ -globin genes sampled from nototheniid species that are distantly related to both icefishes and dragonfishes (fig. 4*b*). Because the placement of the 2 *N. ionah* pseudogenes in the phylogeny is supported by significant Bayesian posterior probabilities and high parsimony bootstrap values, we have designated the inner  $\beta$ -globin pseudogene of the *N. ionah* globin complex as “ $\beta$  CHAN $\Delta$ ” and the outer pseudogene “ $\beta$  NOTO” to reflect their phylogenetic origins (figs. 1*a* and 4*a*). Gene duplication in an ancestral icefish cannot explain the origin of the 2  $\beta$ -globin pseudogenes because the divergence of  $\beta$  CHAN $\Delta$  and  $\beta$  NOTO spans the most recent common ancestor of the entire Antarctic notothenioid radiation that diversified  $\sim 24$  MYA (fig. 4*a* and *b*) (Balushkin 2000; Near 2004; Near et al. 2004). Rather, we propose that gene transfer as the result of introgression via interspecific hybridization between an ancestral icefish lineage and a nototheniid explains the phylogenetic placement of  $\beta$  NOTO in the  $\beta$ -globin gene tree (fig. 4*a*).

### Scenario for Evolutionary Loss of the $\alpha\beta$ -Globin Gene Cluster by Icefishes

The evolution of the globin loci in icefishes from an ancestral condition presumably similar to that of

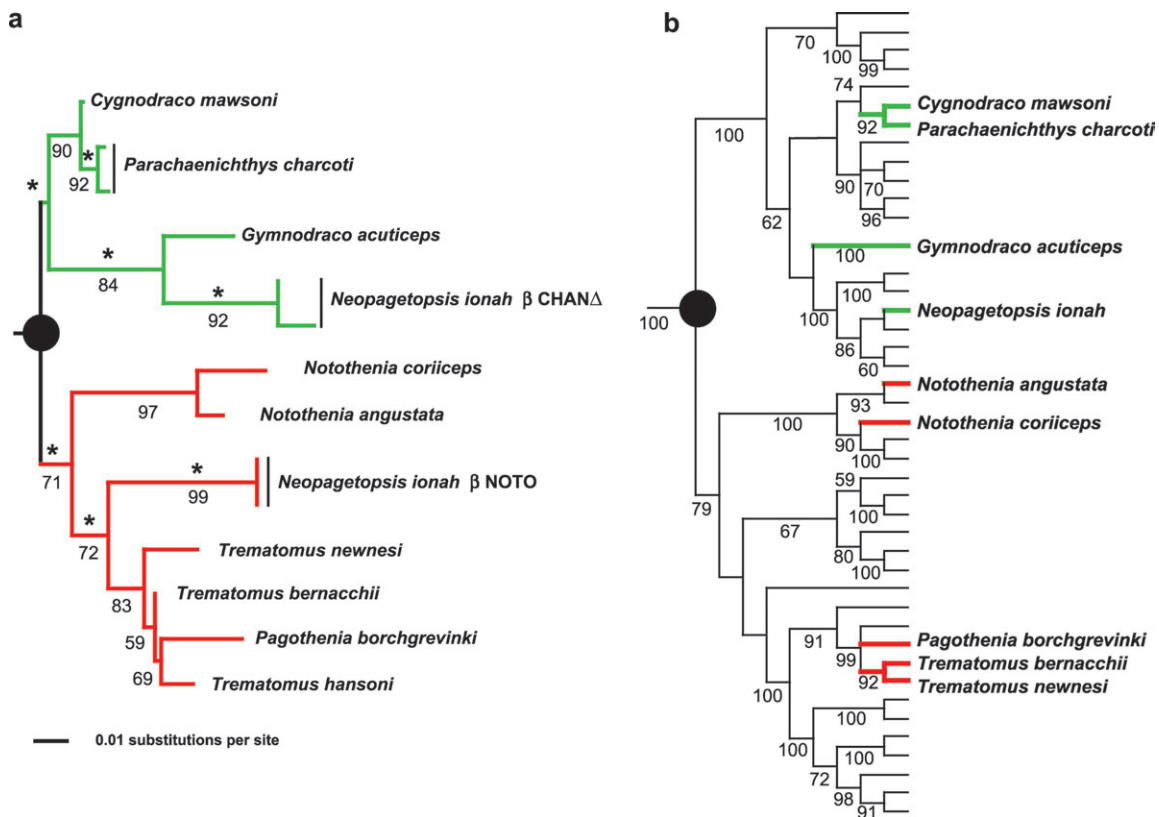

FIG. 4.—Notothenioid gene trees. The node representing the most recent common ancestor to all Antarctic notothenioids is indicated with a large black dot in each tree. Dragonfish species and *Neopagetopsis ionah* are highlighted with green branches and nototheniid species with red branches. (a) Phylogeny of the  $\beta$ -globin coding regions from dragonfishes, nototheniids, and the 2  $\beta$ -pseudogenes in *N. ionah*. The tree is the result of Neighbor-Joining, maximum parsimony, and Bayesian analyses. Numbers report maximum parsimony bootstrap support (2,000 pseudoreplicates) and asterisks designate nodes with Bayesian posterior probabilities greater or equal to 0.95. Scale bar for Neighbor-Joining branch lengths is given below the tree. (b) Phylogeny of notothenioids based on maximum parsimony analysis of the mitochondrial 16S ribosomal RNA gene (Near et al. 2004). Names of species not sampled in the  $\beta$ -globin gene phylogeny (fig. 3a) are removed from the tree. Numbers at nodes report maximum parsimony bootstrap support (2,000 pseudoreplicates) (Near et al. 2004).

hemoglobin-expressing notothenioids appears to have involved multiple mutational events. We hypothesize that the ancestral icefish globin complex, prior to loss of functionality, was similar in length and organization to that of the dragonfish *P. charcoti* (figs. 1a and 5). Formation of a chimeric, “*N. ionah*-like,” globin locus required at least 2 steps, introgression of  $\beta$  NOTO into an ancestral icefish globin locus via nonhomologous recombination and deletion of the 5' end of  $\beta$  CHAN $\Delta$  and  $\beta$  NOTO genes and juxtaposed the residual 3'  $\alpha$ -globin fragment with a tRNA-containing chromosomal segment seen in most icefish species. The  $\alpha$ -globin pseudogene allele of *D. hunteri* departs from this condition via excision of the tRNA element from the contiguous chromosomal DNA (fig. 5).

The predisposition of the nototheniid  $\alpha\beta$ -globin complex to rearrange can be inferred from the structure of the adult globin locus of the representative nototheniid *N. coriiceps*. The  $\sim$ 4-kb intergenic region between the  $\alpha$ - and  $\beta$ -globin genes of this species contains 2 tripartite direct repeats and 2 tripartite indirect repeats (Lau et al. 2001), sequences that facilitate intrachromosomal DNA rearrangements via recombination–repair activities at non-B DNA slipped hairpins and cruciform conformations (Bacolla and Wells 2004), respectively. Thus, it is not surprising that

the globin intergenic region of red-blooded notothenioids shows a disparity in length of  $\sim$ 2 kb between the phylogenetically divergent nototheniids and dragonfishes (fig. 1a).

We conclude that genomic evolution of the functional  $\alpha\beta$ -globin gene cluster found in most teleosts to the 5'-truncated  $\alpha$ -globin pseudogene observed in most icefish species was not the result of a single mutation event. The events leading to the loss of the  $\alpha\beta$ -globin cluster preceded the diversification of the extant icefish species, a conclusion supported by rejection of a multiple loss model using phylogenetic analyses and by ancestral state reconstruction (fig. 2). Due to the stochastic nature of lineage sorting, a “genomic fossil” was preserved in one icefish species that provides insight to the mechanism of hemoglobin loss in this clade. Phylogenetic analysis of the nototheniid  $\beta$ -globin genes indicates that interspecific hybridization between divergent Antarctic nototheniid lineages was an important factor in the loss of hemoglobin in icefishes (fig. 4a and b). We note that hemoglobin loss in icefishes was not selectively neutral but rather maladaptive as shown by the development of compensatory adaptations that enhance oxygen delivery, including increases in cardiac output and blood volume, cutaneous uptake of oxygen, and decreases in metabolic oxygen demand (Hemmingsen 1991). Interestingly, the loss of hemoglobin in icefishes is

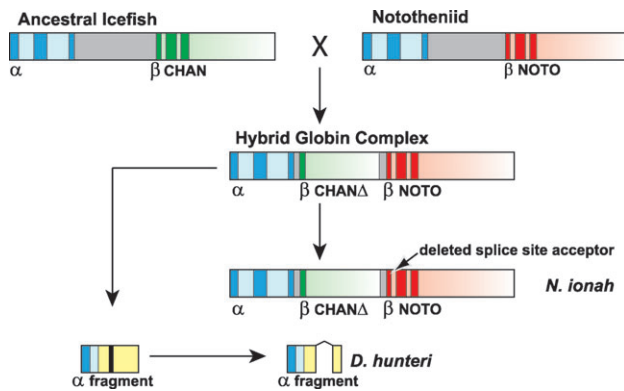

FIG. 5.—Schema for the formation of the disrupted *Neopagetopsis ionah* globin gene complex and the deletion alleles of other icefishes. The ancestral icefish adult  $\alpha$ -globin locus contained the nototheniid  $\alpha$ -globin gene (blue shading as in fig. 1a) and  $\beta$  CHAN, a  $\beta$ -globin gene phylogenetically related to the bathydraconid  $\beta$  gene (green shading as in fig. 1a). We propose that a hybrid icefish globin cluster was formed by introgression of a nototheniid  $\beta$ -globin gene,  $\beta$  NOTO (red), into the icefish globin locus through interspecific hybridization and nonhomologous recombination and by deletion of the 5' portion of  $\beta$  CHAN to yield the pseudogene  $\beta$  CHAN $\Delta$ . The temporal order of these events cannot be determined from this data set. The  $\beta$  NOTO gene of *N. ionah* also acquired a splice-site mutation during evolution of the hybrid locus. Other deletions formed an allele in which the  $\beta$ -globin loci and most of the  $\alpha$ -globin gene were lost such that the remaining 3'  $\alpha$ -globin fragment was juxtaposed with a tRNA-containing chromosomal segment; this allele presumably experienced an additional deletion event to give the *Dacodraco hunteri*  $\alpha$ -globin remnant. Persistence of the hybrid allele in *N. ionah* is attributed to retention of an ancestral polymorphism (Hudson 1990; Hudson and Coyne 2002).

paralleled by the loss of myoglobin, the intracellular oxygen-binding protein, in 6 icefish species through at least 4 different mutational events (Sidell et al. 1997; Grove et al. 2004; Sidell and O'Brien 2006). Despite the costs associated with loss of hemoglobin and myoglobin in icefishes, the chronically cold and oxygen-saturated waters of the Southern Ocean provided an environment in which vertebrate species could flourish without oxygen-binding proteins.

### Acknowledgements

We gratefully acknowledge the support provided to H.W. Detrich's Antarctic field research program by the staff of the Office of Polar Programs of the US National Science Foundation (NSF), by the personnel of Antarctic Support Associates and Raytheon Polar Services Company, and by the captains and crews of the "R/V Polar Duke" and "R/V Laurence M. Gould." We thank C.D. Jones and the US Antarctic Marine Living Resources (AMLR) Program for providing support in our collection of specimens from the South Shetland Islands and the officers and the crew of the "R/V Yuzhmorgeologiya" for logistical field support. T. Iwami and A.L. DeVries provided additional tissue samples. G.P. Wagner provided discussion of ancestral state reconstructions and B.M. Fitzpatrick and A.M. Shedlock provided comments on an earlier version of the manuscript. This work was supported by NSF grants OPP-9120311, 9420712, 9815381, 0089451, and 0336932 to H.W.D.

### Literature Cited

Bacolla A, Wells RD. 2004. Non-B DNA conformations, genomic rearrangements, and human disease. *J Biol Chem* 279:47411–4.

- Balushkin AV. 2000. Morphology, classification, and evolution of nototheniid fishes of the Southern Ocean (Notothenioidei, Perciformes). *J Ichthyol* 40:S74–109.
- Brown WM, George MG, Wilson AC. 1979. Rapid evolution of animal mitochondrial DNA. *Proc Natl Acad Sci USA* 76:1967–71.
- Bull JJ, Charnov EL. 1985. On irreversible evolution. *Evolution* 39:1149–55.
- Chen W.-J, Bonillo C, Lecointre G. 1998. Phylogeny of the Channichthyidae (Notothenioidei, Teleostei) based on two mitochondrial genes. In: di Prisco G, Pisano E, Clarke A, editors. *Fishes of Antarctica: a biological overview*. Berlin, Germany: Springer-Verlag. p 287–98.
- Clément O, Ozouf-Costaz C, Lecointre G, Berrebi P. 1998. Allozymic polymorphism and the phylogeny of the family Channichthyidae. In: di Prisco G, Pisano E, Clarke A, editors. *Fishes of Antarctica: a biological overview*. Berlin, Germany: Springer-Verlag. p 299–309.
- Cocca E, Ratnayake-Lecamwasam M, Parker SK, Camardella L, Ciarmella M, di Prisco G, Detrich HW III. 1995. Genomic remnants of alpha-globin genes in the hemoglobinless Antarctic icefishes. *Proc Natl Acad Sci USA* 92:1817–21.
- D'Avino R, di Prisco G. 1997. The hemoglobin system of Antarctic and non-Antarctic nototheniid fishes. *Comp Biochem Physiol A* 118:1045–9.
- Derome N, Chen W.-J, Dettai A, Bonillo C, Lecointre G. 2002. Phylogeny of Antarctic dragonfishes (Bathydraconidae, Notothenioidei, Teleostei) and related families based on their anatomy and two mitochondrial genes. *Mol Phylogenet Evol* 24:139–52.
- di Prisco G. 1998. Molecular adaptations of Antarctic fish hemoglobins. In: di Prisco G, Pisano E, Clarke A, editors. *Fishes of Antarctica: a biological overview*. New York: Springer-Verlag. p 339–53.
- di Prisco G, Cocca E, Parker SK, Detrich HW III. 2002. Tracking the evolutionary loss of hemoglobin expression by the white-blooded Antarctic icefishes. *Gene* 295:185–91.
- di Prisco G, D'Avino R, Caruso C, Tamburrini M, Camardella L, Rutigliano B, Carratore V, Romano M. 1991. The biochemistry of oxygen transport in red-blooded Antarctic fish. In: di Prisco G, Maresca B, Tota B, editors. *Biology of Antarctic fish*. Berlin, Germany: Springer-Verlag. p 263–81.
- Eastman JT. 1993. *Antarctic fish biology: evolution in a unique environment*. San Diego, CA: Academic Press.
- Eastman JT. 2005. The nature of the diversity of Antarctic fishes. *Polar Biol* 28:93–107.
- Gillemans N, McMorrow T, Tewari R, et al. (12 co-authors). 2003. Functional and comparative analysis of globin loci in pufferfish and humans. *Blood* 101:2842–9.
- Gould SJ. 1970. Dollo on Dollo's Law: irreversibility and the status of evolutionary laws. *J Hist Biol* 3:189–212.
- Grove TJ, Hendrickson JW, Sidell BD. 2004. Two species of Antarctic icefishes (genus *Champscephalus*) share a common genetic lesion leading to the loss of myoglobin expression. *Polar Biol* 27:579–85.
- Hemmingsen EA. 1991. Respiratory and cardiovascular adaptations in hemoglobin-free fish: resolved and unresolved problems. In: di Prisco G, Maresca B, Tota B, editors. *Biology of Antarctic fish*. Berlin, Germany: Springer-Verlag. p 191–203.
- Hudson RR. 1990. Gene genealogies and the coalescent process. In: Futuyma D, Antonovics J, editors. *Oxford surveys in evolutionary biology*. New York: Oxford. p 1–44.
- Hudson RR, Coyne JA. 2002. Mathematical consequences of the genealogical species concept. *Evolution* 56:1557–65.
- Hudson RR, Turelli M. 2003. Stochasticity overrules the "three-times rule": genetic drift, genetic draft, and coalescence times



- for nuclear loci versus mitochondrial DNA. *Evolution* 57: 182–90.
- Iwami T. 1985. Osteology and relationships of the family Channichthyidae. *Mem Nat Inst Polar Res Tokyo* 36 E:1–69.
- Kock K.-H, Stransky C. 2000. The composition of the coastal fish fauna around Elephant Island (South Shetland Islands, Antarctica). *Polar Biol* 23:825–32.
- Kohlsdorf T, Wagner GP. Evidence for the reversibility of digit loss: a phylogenetic study of limb evolution in the genus *Bachia* (Gymnophthalmidae: Squamata). *Evolution*. Forthcoming.
- Lau DT, Saeed A, Parker SK, Detrich HW III. 2001. Adaptive evolution of gene expression in Antarctic fishes: divergent transcription of the 5'-to-5' linked adult  $\alpha$ 1- and  $\beta$ -globin genes of the Antarctic teleost *Notothenia coriiceps* is controlled by dual promoters and intergenic enhancers. *Am Zool* 41:113–32.
- Lewis PO. 2001. A likelihood approach to estimating phylogeny from discrete morphological character data. *Syst Biol* 50: 913–25.
- Maddison WP, Maddison DR. 2006. Mesquite: a modular system for evolutionary analysis. Version 1.11. <http://mesquiteproject.org>.
- Mooers AO, Schluter D. 1999. Reconstructing ancestor states with maximum likelihood: support for one- and two-rate models. *Syst Biol* 48:623–33.
- Moore WS. 1995. Inferring phylogenies from mtDNA variation: mitochondrial-gene trees versus nuclear-gene trees. *Evolution* 49:718–26.
- Near TJ. 2004. Estimating divergence times of notothenioid fishes using a fossil-calibrated molecular clock. *Antarctic Sci* 16: 37–44.
- Near TJ, Pesavento JJ, Cheng C.-HC. 2003. Mitochondrial DNA, morphology and the phylogenetic relationships of Antarctic icefishes (Notothenioidei: Channichthyidae). *Mol Phylogenet Evol* 28:87–98.
- Near TJ, Pesavento JJ, Cheng C.-HC. 2004. Phylogenetic investigations of Antarctic notothenioid fishes (Perciformes: Notothenioidei) using complete gene sequences of the mitochondrial encoded 16S rRNA. *Mol Phylogenet Evol* 32:881–91.
- Pagel M. 1997. Inferring evolutionary processes from phylogenies. *Zool Scr* 26:331–48.
- Pagel M. 1999. The maximum likelihood approach to reconstructing ancestral character states of discrete characters on phylogenies. *Syst Biol* 48:612–22.
- Palumbi SR, Cipriano F, Hare MP. 2001. Predicting nuclear gene coalescence from mitochondrial data: the three-times rule. *Evolution* 55:859–68.
- Patarnello T, Marcato S, Zane L, Varotto V, Bargelloni L. 2003. Phylogeography of the *Chionodraco* genus (Perciformes, Channichthyidae) in the Southern Ocean. *Mol Phylogenet Evol* 28:420–9.
- Posada D, Crandall KA. 1998. Modeltest: testing the model of DNA substitution. *Bioinformatics* 14:817–8.
- Posada D, Crandall KA. 2001. Selecting the best-fit model of nucleotide substitution. *Syst Biol* 50:580–601.
- Ronquist F, Huelsenbeck JP. 2003. MrBayes 3: Bayesian phylogenetic inference under mixed models. *Bioinformatics* 19:1572–4.
- Ruud JT. 1954. Vertebrates without erythrocytes and blood pigment. *Nature* 173:848–50.
- Ruud JT. 1958. Vertebrates without blood pigment: a study of the family Channichthyidae. *Proc XV Int Congr Zool* 1:526–8.
- Sanderson MJ. 2002. Estimating absolute rates of molecular evolution and divergence times: a penalized likelihood approach. *Mol Biol Evol* 19:101–9.
- Sanderson MJ. 2003. r8s: inferring absolute rates of molecular evolution and divergence times in the absence of a molecular clock. *Bioinformatics* 19:301–2.
- Schluter D, Price T, Mooers AO, Ludwig D. 1997. Likelihood of ancestor states in adaptive radiation. *Evolution* 51: 1699–711.
- Sidell BD, O'Brien KM. 2006. When bad things happen to good fish: the loss of hemoglobin and myoglobin expression in Antarctic icefishes. *J Exp Biol* 209:1791–1802.
- Sidell BD, Vayda ME, Small DJ, Londraville RL, Yuan M.-L, Rodnick KJ, Eppley ZA, Costello L. 1997. Variable expression of myoglobin among the hemoglobinless Antarctic icefishes. *Proc Natl Acad Sci USA* 94:3420–4.
- Simpson GG. 1953. The major features of evolution. New York: Columbia University Press.
- Swofford DL. 2003. PAUP\*: phylogenetic analysis using parsimony (\*and other methods). Sunderland, MA: Sinauer Associates.
- Thompson JD, Gibson TJ, Plewniak F, Jeanmougin F, Higgins DG. 1997. The ClustalX windows interface: flexible strategies for multiple sequence alignment aided by quality analysis tools. *Nucleic Acids Res* 22:4673–80.
- Verde C, Howes BD, De Rosa MC, Raiola L, Smulevich G, Williams R, Giardina B, Parisi E, di Prisco G. 2004. Structure and function of the Gondwanian hemoglobin of *Pseudaphritis urvillii*, a primitive notothenioid fish of temperate latitudes. *Protein Sci* 13:2766–81.
- Voskoboinikova OS. 2000. Comparative osteology of *Dacodraco hunteri* and its position within the family Channichthyidae (Notothenioidei). *Zool Zh* 79:321–32.
- Zhao Y, Ratnayake-Lecamwasam M, Parker SK, Cocca E, Camardella L, di Prisco G, Detrich HW III. 1998. The major adult alpha-globin gene of Antarctic teleosts and its remnants in the hemoglobinless icefishes: calibration of the mutational clock for nuclear genes. *J Biol Chem* 273:14745–52.

David Irwin, Associate Editor

Accepted July 24, 2006
